# Supplementary material for: Site-specific water dynamics in the first hydration layer of an anti-freeze glyco-protein: a simulation study
Source: Royal Society of Chemistry journal article supplement (doi:10.1039/d2cp00883a), 2022-01-01
Supplement: d2cp00883a1.pdf [file d2cp00883a1.pdf]

1 **Site-Specific Water Dynamics in the First Hydration Layer of an Anti-**  
2 **Freeze Glyco-Protein: A Simulation Study (Supporting Materials)**

3 Tan Jin<sup>1,2</sup>, Fengqin Long<sup>1,2</sup>, Qiang Zhang<sup>3\*</sup>, Wei Zhuang<sup>1,4\*</sup>

4 1. *State Key Laboratory of Structural Chemistry, Fujian Institute of Research on the*  
5 *Structure of Matter, Chinese Academy of Sciences, Fuzhou, Fujian 350002, China*

6 2. *University of Chinese Academy of Sciences, Beijing 100049, China.*

7 3. *College of Chemistry and Material Sciences, Inner Mongolia University for*  
8 *Nationalities, Tongliao, Inner Mongolia 028043, China*

9 4. *Institute of Urban Environment, Chinese Academy of Sciences, Xiamen, Fujian 361021,*  
10 *China*

11

12 \* To whom correspondence should be addressed. E-mail: wzhuang@fjirsm.ac.cn,  
13 qzhang@imun.edu.cn

14

## 15 A. Several Other Schemes for the Rotational Time Constant Calculations.

16 The rotational time constants were often calculated by fitting the early part (usually 2~10  
17 ps) of the correlation function using a single exponential function

18  $C_{fit}(t)'_{\alpha} = B \exp(-t / \tau'_{\alpha})$ . We also calculated them for methyl and hydroxyl sites in AFGP8 at

19 300 K with the SPC and HBSEB scheme. In Fig. S2, the SPC retardation factor

20  $\xi'_{\alpha,SPC} = \tau'_{\alpha,SPC} / \tau'_{bulk}$  for methyl and hydroxyl sites are 1.5-3.5 and 1.6-5.2, almost consistent

21 with the previous reported window of 2~5.<sup>1, 2</sup> And the HBSEB retardation factor

22  $\xi'_{\alpha,HBSEB} = \tau'_{\alpha,HBSEB} / \tau'_{bulk}$  for methyl and hydroxyl sites are 1.8-4.5 and 2.4-9.3 respectively,

23 considerably smaller than the integrated time constant  $\xi_{\alpha,HBSEB}$  in general. This is because

24  $\tau'_{\alpha}$  are calculated by selectively fitting the correlation functions at their early part. Most of

25 the contributions from the slow components, generated from the non-negligible proportion

26 of the fragments longer than 10 ps in  $\{f_j\}_{\alpha}^{HBSEB}$  (53% and 32% for the methyl and hydroxyl

27 groups, respectively) are therefore neglected. The contribution from the fast component is

28 dominant.  $\xi'_{\alpha,HBSEB}$  are larger than  $\xi'_{\alpha,SPC}$  in general but the differences are much smaller

29 than that between  $\xi_{\alpha,HBSEB}$  and  $\xi_{\alpha,SPC}$ .

30 We also calculated water rotation using a modified SPC scheme, which only takes, for

31 each trajectory in  $\{f_j\}_{\alpha}^{SPC}$ , the portion from time zero to the moment the target water

32 molecule drifts out of the first hydration layer for the first time. We referred to the related

33 analysis as starting-ending-point-controlled (SEPC). The overall SEPC rotational time

34 constants (Fig. S2) are similar to the HBSEB results and much longer and more

35 inhomogeneous than the SPC results, suggesting the critical role of non-first-layer water

36 motion to the difference between HBSEB and SPC results.

37 Note the results of SEPC and HBSEB are not exactly the same since the trajectory  
38 fragment ensembles they are based on have some differences. These differences may come  
39 from the missing fragments that will be away from or enter into the hydration layer during  
40 one switch event. So we also carried out the calculation using a HBSEB+ scheme, in which  
41 we added these switch events into the fragments of HBSEB. It is obvious that the retardation  
42 factors from HBSEB+ are almost the same as SEPC in Fig. S2. This suggests that our  
43 selection method does not bias the reorientation dynamic in the hydration layer.

44

## 45 **B. Categorization for Water Accessible Surface Sites in AFGP8 and Ubiquitin**

46 The hydrogen bond switch events  $\{f'_i\}_\alpha$  were first collected for all first layer water of the  
47 whole protein, and classified into different categories according to their locations. For  
48 instance, if a switch event happens within the first hydration layer of only a heavy atoms of  
49 the backbone but not the disaccharide or the sidechain, we labeled the event as backbone-  
50 only, all the events happening within the first layer of the same backbone heavy atom were  
51 grouped together for the calculation of water reorientation correlation function of this single  
52 site, all these single-site correlation function were then averaged over to calculate the average  
53 correlation function for this category. Similarly, we also calculated the averaged single site  
54 reorientation correlation functions for other categories.

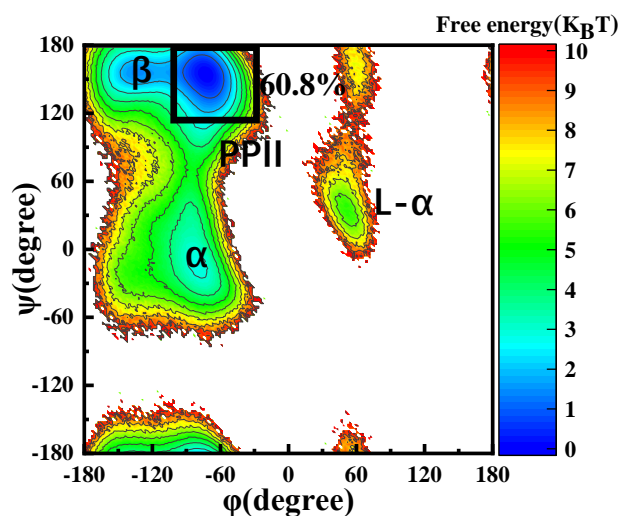

55

56 **Fig. S1** Ramachandran plot of AFGP8 at 300 K.

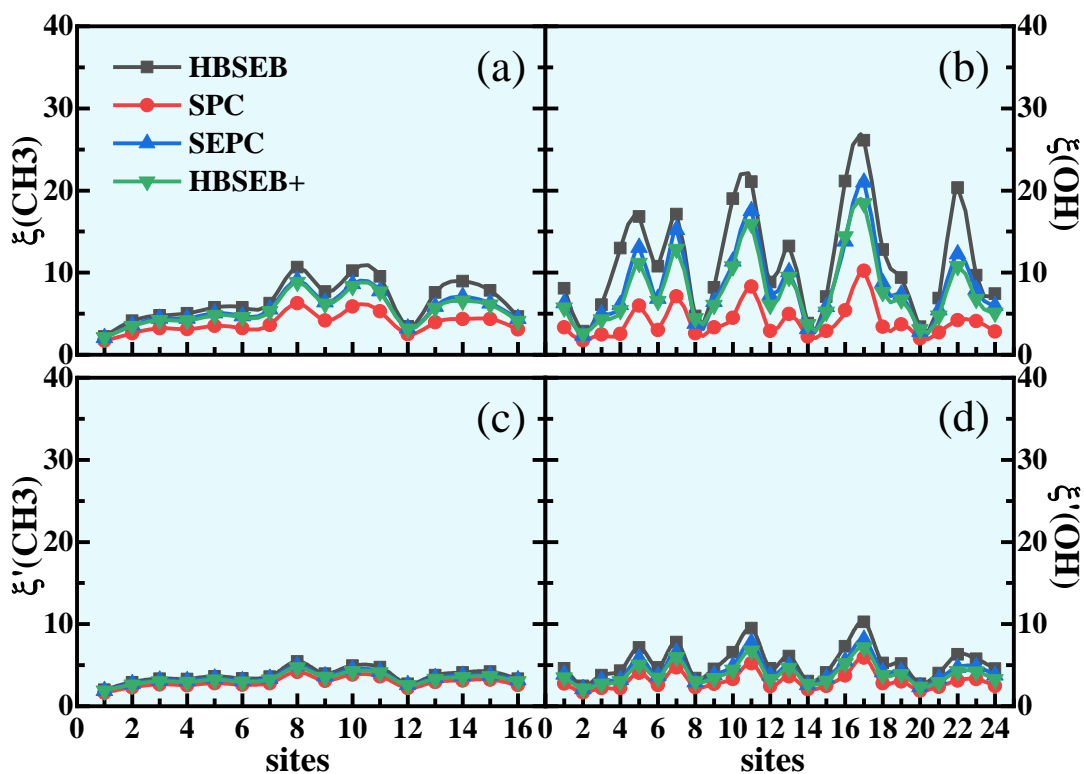

57

58 **Fig. S2** Overall HBSEB, SPC, SEPC and HBSEB+ hydration water reorientation retardation factors  
 59 at the methyl (a) and hydroxyl sites (b) at 300 K. HBSEB, SPC, SEPC and HBSEB+ hydration water  
 60 reorientation retardation factors for methyl sites (c) and hydroxyl sites (d) calculated by fitting the  
 61 correlation functions within their early part (2-10 ps) using the single exponential function at 300 K.

62

63

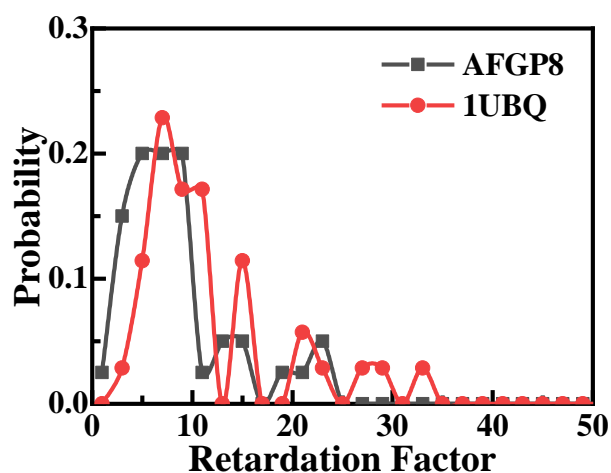

64

65 **Fig. S3** The distribution of retardation factor between AFGP8 and 1UBQ using HBSEB in the  
 66 hydration layer for the methyl+hydroxyl groups at 300 K.

67

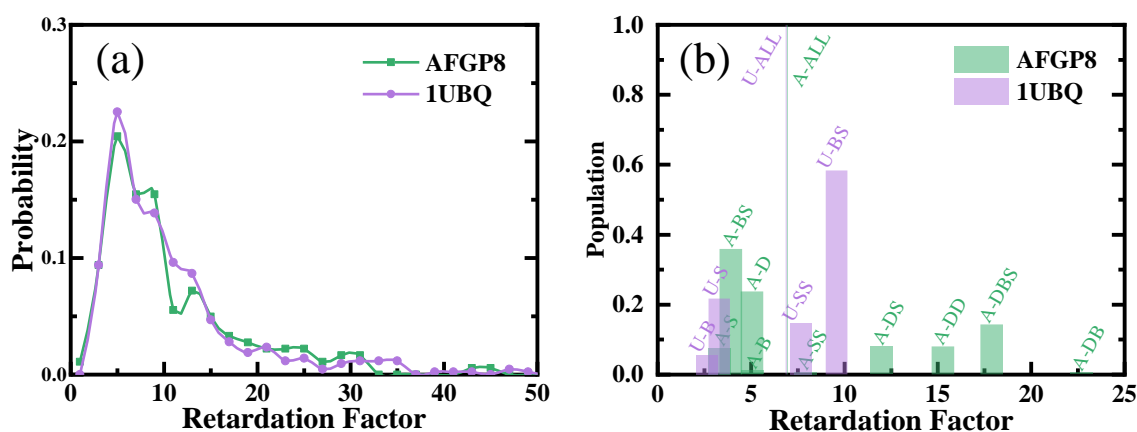

68

69 **Fig. S4** The probability distribution of HBSEB retardation factor of the first layer water for all the  
 70 sites in the AFGP8 and ubiquitin at 246 K (a). The populations and rotational retardation factors for  
 71 different categories of first layer water hydrogen bond switching events on the surface of AFGP8 and  
 72 ubiquitin at 246 K (b). For AFGP8, the categories include backbone-only (A-B), one-sidechain-only  
 73 (A-S), one-disaccharide-only (A-D), disaccharide-disaccharide (A-DD), sidechain-sidechain(A-SS),  
 74 backbone-sidechain (A-BS), disaccharide-backbone (A-DB), disaccharide-sidechain(A-DS),  
 75 disaccharide-backbone sidechain (A-DBS) and overall (A-ALL). For ubiquitin, the categories  
 76 include backbone-only(U-B), one-sidechain-only(U-S), sidechain-sidechain(U-SS), backbone-  
 77 sidechain (U-BS) and overall (U-ALL).

78

79

80

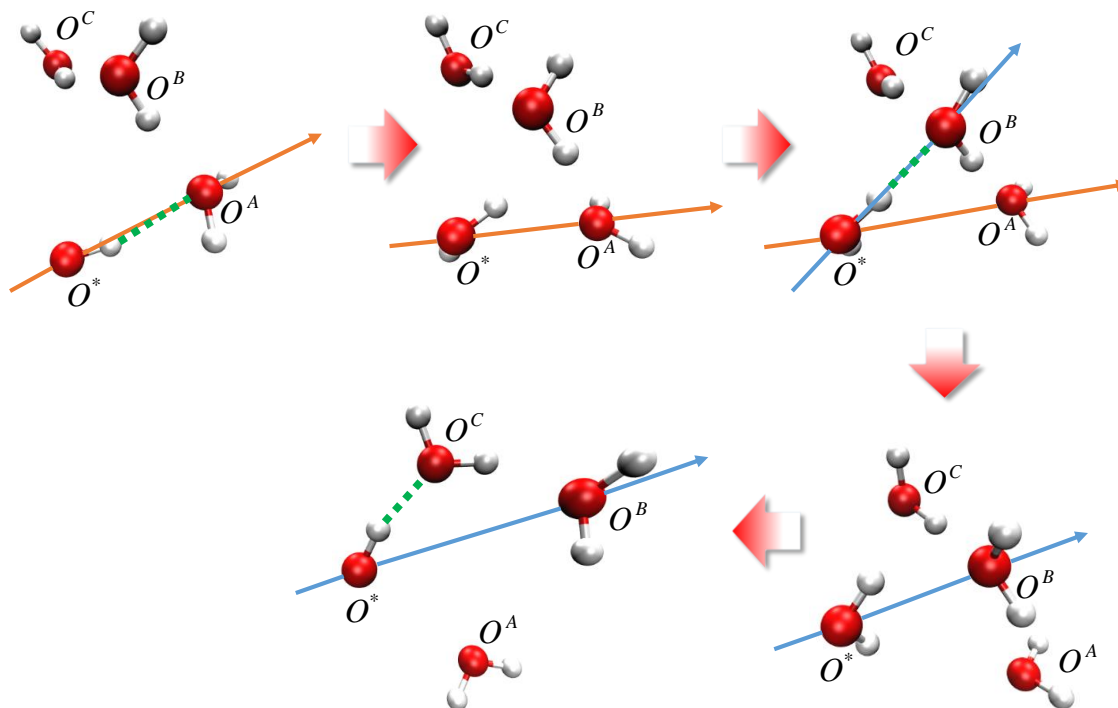

81

82 **Scheme S1** The cartoon representations of cross-event frame motion. The target water(oxygen atom

83  $O^*$ ) jumps from  $O^A$  to  $O^B$  and then from  $O^B$  to  $O^C$  including two continue switching events.

84 The molecular frame in the first event is the vector  $\overline{O^*O^A}$  (orange arrow) and the molecular frame

85 in the second event is the vector  $\overline{O^*O^B}$  (blue arrow). To ensure the continuity of cross-event frame

86 correlation function, the frame  $\overline{O^*O^B}$  converts by the rotation matrix which rotate the angle

87  $\angle O^B O^* O^A$  in the joint snapshot between switching events.

88

89

90

91

92

93

94

95

96 **Table S1** Tri-exponential fitting parameters and the integrated time (ps) of the HBSEB second rank  
 97 rotation of hydration layer water molecules around the methyl sites at 300 K.

|        | A1    | $\tau_1$ | A2    | $\tau_2$ | A3    | $\tau_3$ | $\langle\tau\rangle$ | R <sup>2</sup> |
|--------|-------|----------|-------|----------|-------|----------|----------------------|----------------|
| CH3-1  | 0.287 | 0.138    | 0.500 | 3.099    | 0.213 | 12.143   | 4.178                | 0.9996         |
| CH3-2  | 0.283 | 0.134    | 0.487 | 3.870    | 0.230 | 24.665   | 7.602                | 0.9994         |
| CH3-3  | 0.275 | 0.128    | 0.439 | 3.816    | 0.285 | 24.027   | 8.565                | 0.9995         |
| CH3-4  | 0.275 | 0.130    | 0.448 | 3.882    | 0.278 | 27.667   | 9.461                | 0.9994         |
| CH3-5  | 0.280 | 0.130    | 0.463 | 3.925    | 0.257 | 23.754   | 7.966                | 0.9995         |
| CH3-6  | 0.278 | 0.131    | 0.452 | 4.135    | 0.270 | 34.792   | 11.303               | 0.9993         |
| CH3-7  | 0.279 | 0.128    | 0.440 | 4.264    | 0.280 | 36.800   | 12.232               | 0.9993         |
| CH3-8  | 0.264 | 0.122    | 0.385 | 4.314    | 0.351 | 44.031   | 17.157               | 0.9994         |
| CH3-9  | 0.281 | 0.133    | 0.464 | 4.488    | 0.255 | 47.556   | 14.251               | 0.9992         |
| CH3-10 | 0.264 | 0.123    | 0.398 | 4.418    | 0.337 | 54.139   | 20.059               | 0.9992         |
| CH3-11 | 0.268 | 0.126    | 0.408 | 4.337    | 0.324 | 49.878   | 17.966               | 0.9993         |
| CH3-12 | 0.279 | 0.131    | 0.470 | 3.865    | 0.251 | 21.584   | 7.268                | 0.9995         |
| CH3-13 | 0.278 | 0.132    | 0.464 | 4.329    | 0.259 | 46.835   | 14.159               | 0.9993         |
| CH3-14 | 0.279 | 0.129    | 0.452 | 4.444    | 0.269 | 54.496   | 16.692               | 0.9992         |
| CH3-15 | 0.270 | 0.128    | 0.421 | 4.418    | 0.309 | 42.837   | 15.126               | 0.9993         |
| CH3-16 | 0.262 | 0.128    | 0.424 | 3.892    | 0.314 | 22.460   | 8.727                | 0.9996         |

98

99

100 **Table S2** Tri-exponential fitting parameters and the integrated time (ps) of the HBSEB second rank  
 101 rotation of hydration layer water molecules around the hydroxyl sites at 300 K.

|  | A1 | $\tau_1$ | A2 | $\tau_2$ | A3 | $\tau_3$ | $\langle\tau\rangle$ | R <sup>2</sup> |
|--|----|----------|----|----------|----|----------|----------------------|----------------|
|--|----|----------|----|----------|----|----------|----------------------|----------------|

|       |       |       |       |       |       |         |        |        |
|-------|-------|-------|-------|-------|-------|---------|--------|--------|
| OH-1  | 0.279 | 0.121 | 0.376 | 3.954 | 0.346 | 37.701  | 14.548 | 0.9994 |
| OH-2  | 0.295 | 0.120 | 0.415 | 3.107 | 0.290 | 14.288  | 5.474  | 0.9996 |
| OH-3  | 0.288 | 0.119 | 0.401 | 3.603 | 0.311 | 33.159  | 11.802 | 0.9994 |
| OH-4  | 0.296 | 0.122 | 0.410 | 3.959 | 0.294 | 61.595  | 19.754 | 0.9993 |
| OH-5  | 0.263 | 0.107 | 0.293 | 4.337 | 0.444 | 60.103  | 27.962 | 0.9993 |
| OH-6  | 0.292 | 0.122 | 0.398 | 4.569 | 0.311 | 74.202  | 24.911 | 0.9991 |
| OH-7  | 0.264 | 0.113 | 0.314 | 4.336 | 0.422 | 73.526  | 32.414 | 0.9992 |
| OH-8  | 0.294 | 0.123 | 0.421 | 3.677 | 0.284 | 24.839  | 8.650  | 0.9995 |
| OH-9  | 0.284 | 0.115 | 0.371 | 3.647 | 0.345 | 37.903  | 14.479 | 0.9994 |
| OH-10 | 0.281 | 0.112 | 0.340 | 3.855 | 0.379 | 71.522  | 28.446 | 0.9992 |
| OH-11 | 0.246 | 0.094 | 0.231 | 4.084 | 0.523 | 87.374  | 46.705 | 0.9992 |
| OH-12 | 0.292 | 0.124 | 0.364 | 4.206 | 0.343 | 45.230  | 17.102 | 0.9990 |
| OH-13 | 0.275 | 0.117 | 0.338 | 3.925 | 0.387 | 45.740  | 19.059 | 0.9993 |
| OH-14 | 0.296 | 0.122 | 0.428 | 3.359 | 0.276 | 19.691  | 6.914  | 0.9994 |
| OH-15 | 0.291 | 0.123 | 0.410 | 4.001 | 0.298 | 50.364  | 16.707 | 0.9991 |
| OH-16 | 0.261 | 0.095 | 0.293 | 3.221 | 0.445 | 97.137  | 44.217 | 0.9990 |
| OH-17 | 0.253 | 0.099 | 0.257 | 4.369 | 0.491 | 94.324  | 47.432 | 0.9991 |
| OH-18 | 0.287 | 0.119 | 0.398 | 4.846 | 0.315 | 93.624  | 31.474 | 0.9991 |
| OH-19 | 0.281 | 0.119 | 0.353 | 3.876 | 0.365 | 39.101  | 15.691 | 0.9994 |
| OH-20 | 0.298 | 0.123 | 0.437 | 3.360 | 0.264 | 17.711  | 6.186  | 0.9995 |
| OH-21 | 0.286 | 0.117 | 0.396 | 3.635 | 0.318 | 34.067  | 12.316 | 0.9994 |
| OH-22 | 0.281 | 0.114 | 0.326 | 4.005 | 0.393 | 101.169 | 41.134 | 0.9990 |
| OH-23 | 0.265 | 0.107 | 0.305 | 3.717 | 0.430 | 37.585  | 17.311 | 0.9995 |



|       |       |       |       |       |       |        |        |        |
|-------|-------|-------|-------|-------|-------|--------|--------|--------|
| OH-24 | 0.296 | 0.123 | 0.386 | 4.136 | 0.318 | 52.030 | 18.190 | 0.9991 |
|-------|-------|-------|-------|-------|-------|--------|--------|--------|

102

103

104 **Table S3** Tri-exponential fitting parameters and the integrated time (ps) of the SPC second rank rotation  
 105 of hydration layer water molecules around the methyl sites at 300 K.

|        | A1    | $\tau_1$ | A2    | $\tau_2$ | A3    | $\tau_3$ | $\langle\tau\rangle$ | R <sup>2</sup> |
|--------|-------|----------|-------|----------|-------|----------|----------------------|----------------|
| CH3-1  | 0.259 | 0.127    | 0.454 | 2.459    | 0.287 | 7.488    | 3.297                | 0.9998         |
| CH3-2  | 0.261 | 0.121    | 0.467 | 3.217    | 0.272 | 12.463   | 4.922                | 0.9997         |
| CH3-3  | 0.258 | 0.116    | 0.437 | 3.332    | 0.305 | 14.133   | 5.800                | 0.9997         |
| CH3-4  | 0.258 | 0.121    | 0.450 | 3.394    | 0.292 | 14.967   | 5.933                | 0.9997         |
| CH3-5  | 0.259 | 0.120    | 0.444 | 3.287    | 0.297 | 12.981   | 5.347                | 0.9997         |
| CH3-6  | 0.259 | 0.119    | 0.450 | 3.562    | 0.291 | 17.150   | 6.626                | 0.9997         |
| CH3-7  | 0.260 | 0.116    | 0.439 | 3.697    | 0.301 | 18.209   | 7.135                | 0.9996         |
| CH3-8  | 0.251 | 0.116    | 0.397 | 3.945    | 0.352 | 23.915   | 10.012               | 0.9996         |
| CH3-9  | 0.260 | 0.122    | 0.460 | 3.868    | 0.279 | 20.447   | 7.526                | 0.9996         |
| CH3-10 | 0.250 | 0.116    | 0.410 | 4.050    | 0.340 | 26.786   | 10.800               | 0.9996         |
| CH3-11 | 0.253 | 0.118    | 0.418 | 3.915    | 0.329 | 24.150   | 9.600                | 0.9996         |
| CH3-12 | 0.259 | 0.121    | 0.452 | 3.263    | 0.289 | 12.234   | 5.044                | 0.9997         |
| CH3-13 | 0.258 | 0.121    | 0.466 | 3.779    | 0.276 | 20.302   | 7.393                | 0.9996         |
| CH3-14 | 0.260 | 0.119    | 0.456 | 3.901    | 0.284 | 21.837   | 8.014                | 0.9996         |
| CH3-15 | 0.253 | 0.118    | 0.427 | 3.862    | 0.320 | 20.755   | 8.316                | 0.9996         |
| CH3-16 | 0.240 | 0.116    | 0.417 | 3.330    | 0.343 | 13.191   | 5.939                | 0.9998         |

106

107

108  
109

**Table S4** Tri-exponential fitting parameters and the integrated time (ps) of the SPC second rank rotation of hydration layer water molecules around the hydroxyl sites at 300 K.

|       | A1    | $\tau_1$ | A2    | $\tau_2$ | A3    | $\tau_3$ | $\langle\tau\rangle$ | R <sup>2</sup> |
|-------|-------|----------|-------|----------|-------|----------|----------------------|----------------|
| OH-1  | 0.262 | 0.111    | 0.407 | 3.186    | 0.331 | 14.631   | 6.164                | 0.9997         |
| OH-2  | 0.262 | 0.100    | 0.385 | 2.221    | 0.353 | 7.092    | 3.385                | 0.9998         |
| OH-3  | 0.272 | 0.111    | 0.454 | 3.015    | 0.274 | 12.682   | 4.878                | 0.9996         |
| OH-4  | 0.272 | 0.112    | 0.464 | 3.033    | 0.264 | 13.152   | 4.907                | 0.9996         |
| OH-5  | 0.255 | 0.105    | 0.358 | 3.810    | 0.387 | 23.717   | 10.571               | 0.9996         |
| OH-6  | 0.268 | 0.108    | 0.426 | 3.218    | 0.305 | 14.436   | 5.810                | 0.9996         |
| OH-7  | 0.253 | 0.111    | 0.366 | 3.994    | 0.381 | 29.529   | 12.740               | 0.9996         |
| OH-8  | 0.273 | 0.113    | 0.461 | 3.031    | 0.266 | 11.964   | 4.606                | 0.9996         |
| OH-9  | 0.271 | 0.111    | 0.435 | 3.219    | 0.294 | 15.908   | 6.103                | 0.9996         |
| OH-10 | 0.266 | 0.110    | 0.422 | 3.347    | 0.312 | 18.405   | 7.179                | 0.9996         |
| OH-11 | 0.242 | 0.096    | 0.305 | 3.993    | 0.454 | 35.506   | 17.343               | 0.9995         |
| OH-12 | 0.268 | 0.108    | 0.408 | 3.096    | 0.324 | 14.061   | 5.846                | 0.9997         |
| OH-13 | 0.263 | 0.112    | 0.398 | 3.490    | 0.339 | 19.992   | 8.196                | 0.9996         |
| OH-14 | 0.270 | 0.107    | 0.438 | 2.663    | 0.292 | 9.702    | 4.032                | 0.9997         |
| OH-15 | 0.271 | 0.111    | 0.454 | 3.213    | 0.275 | 15.789   | 5.825                | 0.9996         |
| OH-16 | 0.264 | 0.110    | 0.405 | 3.678    | 0.331 | 27.891   | 10.759               | 0.9995         |
| OH-17 | 0.246 | 0.099    | 0.314 | 4.091    | 0.440 | 35.416   | 16.894               | 0.9995         |
| OH-18 | 0.268 | 0.108    | 0.414 | 3.380    | 0.319 | 15.449   | 6.352                | 0.9996         |
| OH-19 | 0.265 | 0.111    | 0.397 | 3.210    | 0.338 | 15.362   | 6.492                | 0.9996         |
| OH-20 | 0.270 | 0.106    | 0.436 | 2.597    | 0.293 | 8.803    | 3.745                | 0.9997         |

|       |       |       |       |       |       |        |       |        |
|-------|-------|-------|-------|-------|-------|--------|-------|--------|
| OH-21 | 0.271 | 0.110 | 0.449 | 3.067 | 0.281 | 13.565 | 5.211 | 0.9996 |
| OH-22 | 0.270 | 0.113 | 0.414 | 3.667 | 0.316 | 24.240 | 9.216 | 0.9995 |
| OH-23 | 0.254 | 0.102 | 0.361 | 3.164 | 0.385 | 16.222 | 7.408 | 0.9997 |
| OH-24 | 0.272 | 0.110 | 0.440 | 3.132 | 0.289 | 14.195 | 5.503 | 0.9996 |

110

111

112 **REFERENCES**

- 113 1. F. Sterpone, G. Stirnemann and D. Laage, *J. Am. Chem. Soc.*, 2012, **134**, 4116-4119.  
114 2. A. C. Fogarty and D. Laage, *J. Phys. Chem. B*, 2014, **118**, 7715-7729.

115
